# Supplementary material for: Zika Virus Emergence in Mosquitoes in Southeastern Senegal, 2011
Source: PLoS One. 2014 Oct 13;9(10):e109442. doi: 10.1371/journal.pone.0109442 (PMC4195678; doi:10.1371/journal.pone.0109442)
Supplement: Table S3 — Mosquito females infected by Zika virus, Kédougou, 2011. (XLSX) [file pone.0109442.s003.xlsx]

## Sheet: Feuil1
Table S3. Mosquito females infected by Zika virus, Kédougou, 2011
Month	Block	Land cover	Species	No. Pools	No. Positive pools	No. Mosquitoes collected
June	B1	Forest ground	Ae. unilineatus	1	1	1
		Village outdoor	Ae. vittatus	1	1	1
	E2	Forest ground	Ae. furcifer	1	1	2
September	D2	Forest ground	Ae. luteocephalus	1	1	6
		Forest canopy	Ae. africanus	1	1	3
	E1	Agriculture	Cx. perfuscus	1	1	1
		Forest ground	Ae. aegypti	1	1	1
		Forest ground	Ae. dalzieli	1	1	10
		Forest ground	Ma. Uniformis	1	1	1
		Forest ground	Ae. vittatus	1	1	9
		Forest canopy	Ae. furcifer	3	2	84
		Forest canopy	Ae. vittatus	1	1	4
October	A2	Forest canopy	Ae. africanus	1	1	25
	B2	Forest canopy	Ae. luteocephalus	1	1	26
	B1	Agriculture	Ae. hursitus	1	1	1
		Barren	An. coustani	1	1	1
		Barren	Ae. metallicus	1	1	2
		Forest ground	Ae. hursitus	1	1	2
		Savannah	Ae. metallicus	1	1	3
	C2	Forest canopy	Ae. luteocephalus	2	1	45
	D1	Forest ground	Ae. furcifer	2	1	47
		Forest canopy	Ae. luteocephalus	2	1	40
November	A2	Forest ground	Ae. africanus	2	2	33
		Forest ground	Ae. luteocephalus	1	1	1
		Forest canopy	Ae. africanus	2	1	33
	B1	Agriculture	Ae. dalzieli	2	1	40
	E2	Barren	Ae. taylori	1	1	1
December	D1	Forest canopy	Ae. taylori	1	1	4
